# Supplementary material for: Immunoproteasome subunit ß5i/LMP7-deficiency in atherosclerosis
Source: PubMed Central journal article supplement (PMC5645401; doi:10.1038/s41598-017-13592-w), 2017-10-17
Supplement: 41598_2017_13592_MOESM1_ESM.pdf [file 41598_2017_13592_MOESM1_ESM.pdf]

## Supplementary Information

### Immunoproteasome subunit $\beta 5i$ /LMP7-deficiency in atherosclerosis

Bernd Hewing<sup>1,2,7</sup>, Antje Ludwig<sup>1,2</sup>, Cristian Dan<sup>1,2</sup>, Max Pötzsch<sup>1,2</sup>, Carmen Hannemann<sup>1,2</sup>, Andreas Petry<sup>3,4</sup>, Dilyara Lauer<sup>5</sup>, Agnes Görlach<sup>3,4</sup>, Elena Kaschina<sup>5</sup>, Dominik N. Müller<sup>2,6,7,8</sup>, Gert Baumann<sup>1</sup>, Verena Stangl<sup>1,2</sup>, Karl Stangl<sup>1,2</sup>, Nicola Wilck<sup>1,2,6,8</sup>

<sup>1</sup>Medizinische Klinik m.S. Kardiologie und Angiologie, Charité-Universitätsmedizin Berlin, Campus Mitte, Berlin, Germany

<sup>2</sup>DZHK (German Center for Cardiovascular Research), partner site Berlin, Germany

<sup>3</sup>Experimental and Molecular Pediatric Cardiology, German Heart Center Munich, Technical University Munich, Munich, Germany

<sup>4</sup>DZHK (German Center for Cardiovascular Research), partner site Munich, Germany

<sup>5</sup>Institute of Pharmacology, Center for Cardiovascular Research, Charité-Universitätsmedizin Berlin, Berlin, Germany

<sup>6</sup>Experimental and Clinical Research Center, a joint cooperation of Max Delbrück Center for Molecular Medicine and Charité Medical Faculty, Berlin, Germany

<sup>7</sup>Berlin Institute of Health (BIH), Berlin, Germany

<sup>8</sup>Max Delbrück Center for Molecular Medicine in the Helmholtz Association, Berlin, Germany

## Supplement tables

### Supplement table S1: Body weight and lipid levels

|                                 | 6 weeks control diet |                                         |              | 24 weeks control diet |                                         |              |
|---------------------------------|----------------------|-----------------------------------------|--------------|-----------------------|-----------------------------------------|--------------|
|                                 | LDLR <sup>-/-</sup>  | LDLR <sup>-/-</sup> LMP7 <sup>-/-</sup> | p value      | LDLR <sup>-/-</sup>   | LDLR <sup>-/-</sup> LMP7 <sup>-/-</sup> | p value      |
| <b>Body weight, g</b>           | 26.6 ± 2.3           | 26.7 ± 1.7                              | 0.967        | 30.7 ± 2.0            | 27.9 ± 3.5                              | <b>0.034</b> |
| <b>Total cholesterol, mg/dl</b> | 286.7 ± 33.3         | 284.7 ± 54.7                            | 0.920        | 290.2 ± 22.1          | 276.4 ± 31.1                            | 0.245        |
| <b>HDL-C, mg/dl</b>             | 90.9 ± 19.2          | 96.3 ± 7.4                              | 0.4          | 128.1 ± 12.7          | 124.8 ± 19.8                            | 0.818        |
| <b>Non-HDL-C, mg/dl</b>         | 195.9 ± 19.2         | 188.4 ± 56.9                            | 0.695        | 162.1 ± 53.4          | 151.6 ± 31.9                            | 0.582        |
| <b>Triglycerides, mg/dl</b>     | 164.9 ± 38.5         | 121.6 ± 48.2                            | <b>0.034</b> | 94.4 ± 13.5           | 81.2 ± 20.0                             | 0.083        |

n=11 per group; mean ± SD. Statistical analysis using unpaired *t*-test (Welch test for unequal variances). HDL-C, high-density lipoprotein cholesterol.

### Supplement Table S2: Cardiac dimensions and function

|                          | 6 weeks control diet |                                         |         | 6 weeks WD          |                                         |         |
|--------------------------|----------------------|-----------------------------------------|---------|---------------------|-----------------------------------------|---------|
|                          | LDLR <sup>-/-</sup>  | LDLR <sup>-/-</sup> LMP7 <sup>-/-</sup> | p value | LDLR <sup>-/-</sup> | LDLR <sup>-/-</sup> LMP7 <sup>-/-</sup> | p value |
| <b>n</b>                 | <b>5</b>             | <b>5</b>                                |         | <b>4</b>            | <b>3</b>                                |         |
| <b>LVIDd, mm</b>         | 4.0 ± 0.3            | 3.8 ± 0.3                               | 0.256   | 3.9 ± 0.1           | 3.7 ± 0.2                               | 0.286   |
| <b>LVIDs, mm</b>         | 2.7 ± 0.4            | 2.6 ± 0.2                               | 0.503   | 2.5 ± 0.1           | 2.5 ± 0.2                               | 0.8     |
| <b>LVEF, %</b>           | 60.9 ± 7.5           | 61.0 ± 3.1                              | 0.98    | 65.1 ± 1.9          | 62.4 ± 4.3                              | 0.4     |
| <b>FS, %</b>             | 32.4 ± 5.2           | 32.3 ± 2.2                              | 0.948   | 35.2 ± 1.4          | 33.1 ± 3.2                              | 0.4     |
| <b>Stroke volume, µl</b> | 42.0 ± 4.2           | 37.3 ± 6.4                              | 0.203   | 41.2 ± 3.3          | 36.3 ± 6.3                              | 0.230   |

Mean ± SD. Statistical analysis using unpaired *t*-test or Mann-Whitney *U* test. WD, Western-type diet; LVIDd, end-diastolic left ventricular inner dimension; LVIDs, systolic left ventricular inner dimension; FS, fractional shortening; LVEF, left ventricular ejection fraction.

## Supplement Figure S1

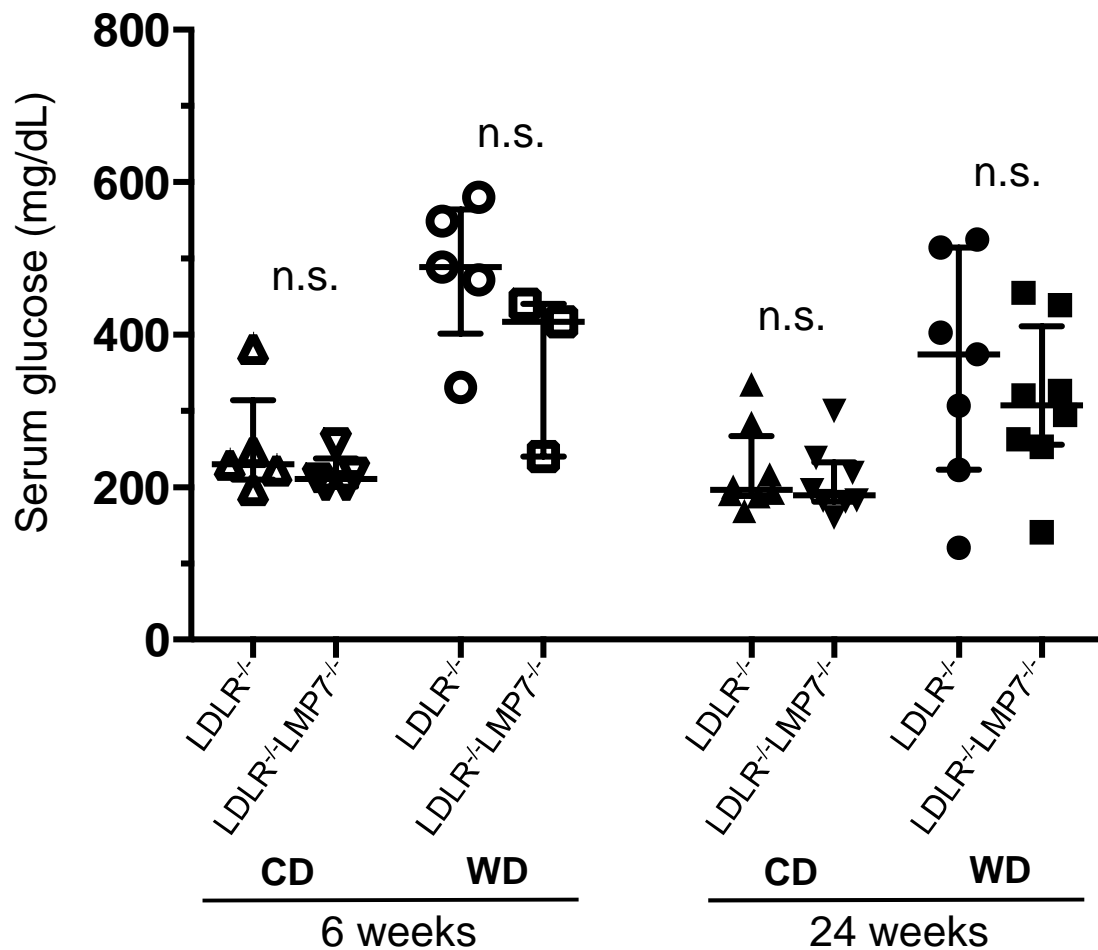

**Supplement Figure S1. Serum glucose levels.** LDLR<sup>-/-</sup>LMP7<sup>-/-</sup> and LDLR<sup>-/-</sup> mice were fed a control (CD) or a high-fat Western-type diet (WD) for either 6 or 24 weeks. Data presented as mean  $\pm$  SEM. n.s.= statistically non-significant using unpaired *t*-test or Mann-Whitney *U* test.

## Supplement Figure S2

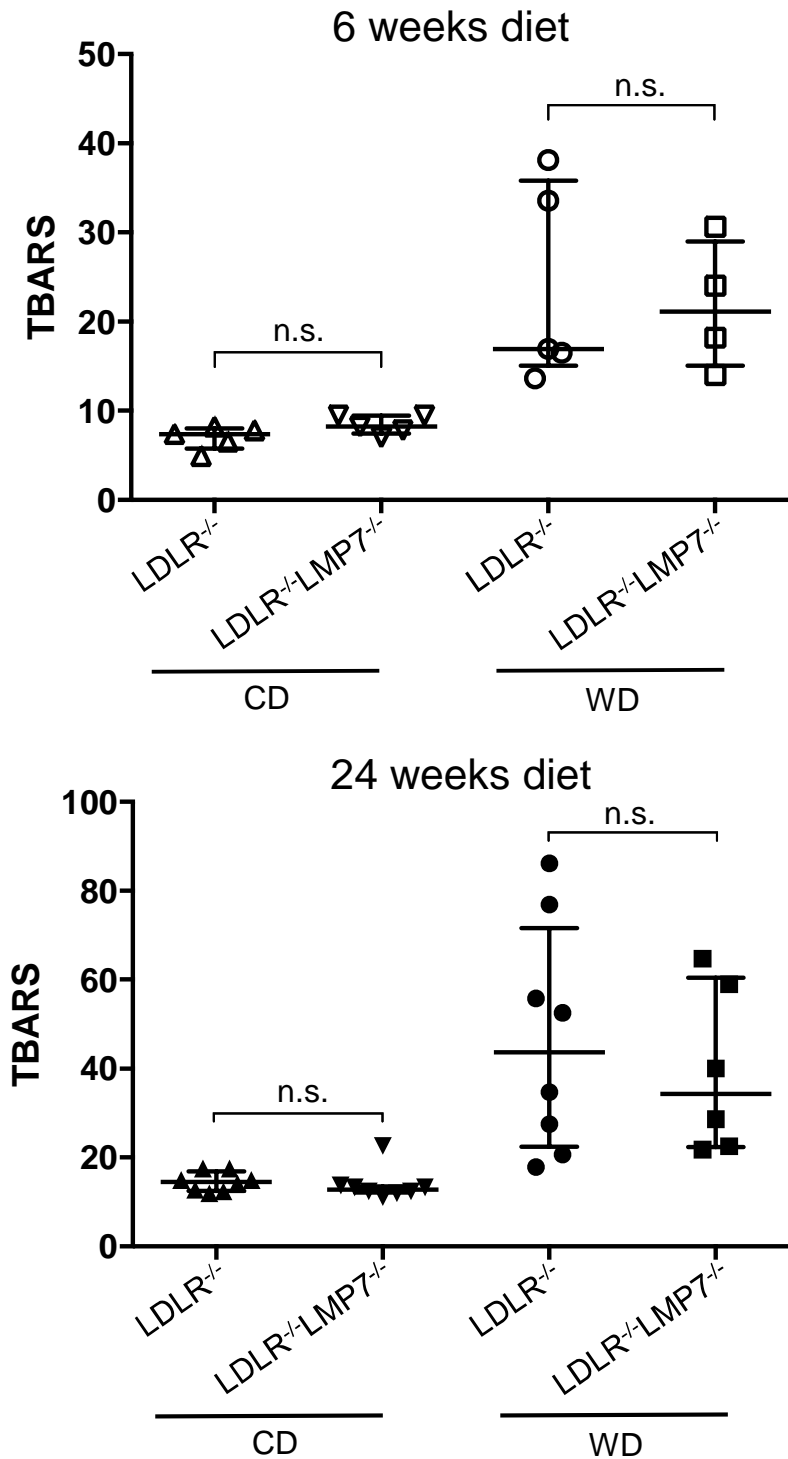

**Supplement Figure S2. Serum levels of thiobarbituric acid reactive substances (TBARS).** LDLR<sup>-/-</sup>LMP7<sup>-/-</sup> and LDLR<sup>-/-</sup> mice were fed a control (CD) or a high-fat Western-type diet (WD) for either 6 or 24 weeks. Data are presented as individual values with median and interquartile ranges indicated. All comparisons between CD and WD fed mice were statistically significant ( $p < 0.05$ ). n.s.= statistically not significant using unpaired  $t$ -test or Mann-Whitney  $U$  test.

## Supplement Figure S3

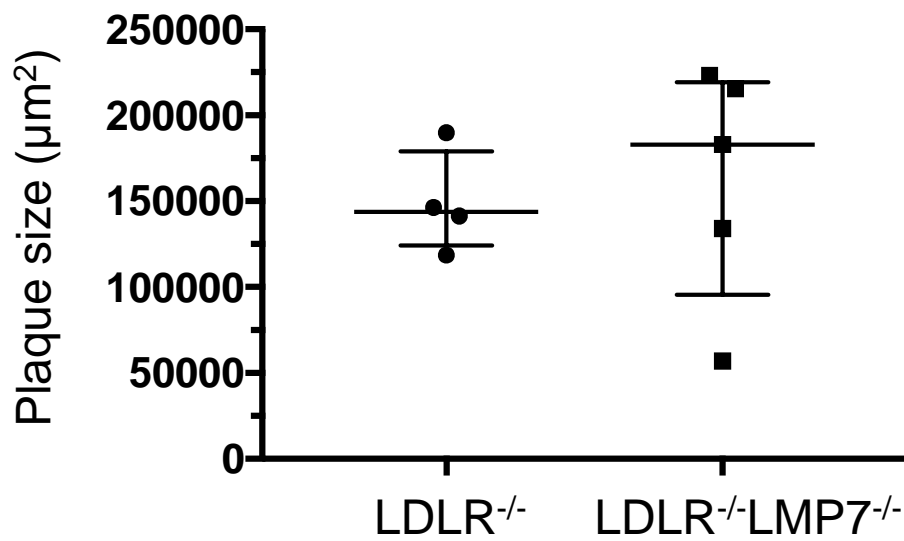

**Supplement Figure S3. Plaque size in the *truncus brachiocephalicus*.** LDLR<sup>-/-</sup> LMP7<sup>-/-</sup> and LDLR<sup>-/-</sup> mice were fed a high-fat Western-type diet for 24 weeks to induce advanced stage atherosclerosis. Data are presented as individual values with median and interquartile ranges indicated. n.s. = statistically non-significant using Mann-Whitney *U* test.

## Supplement Figure S4

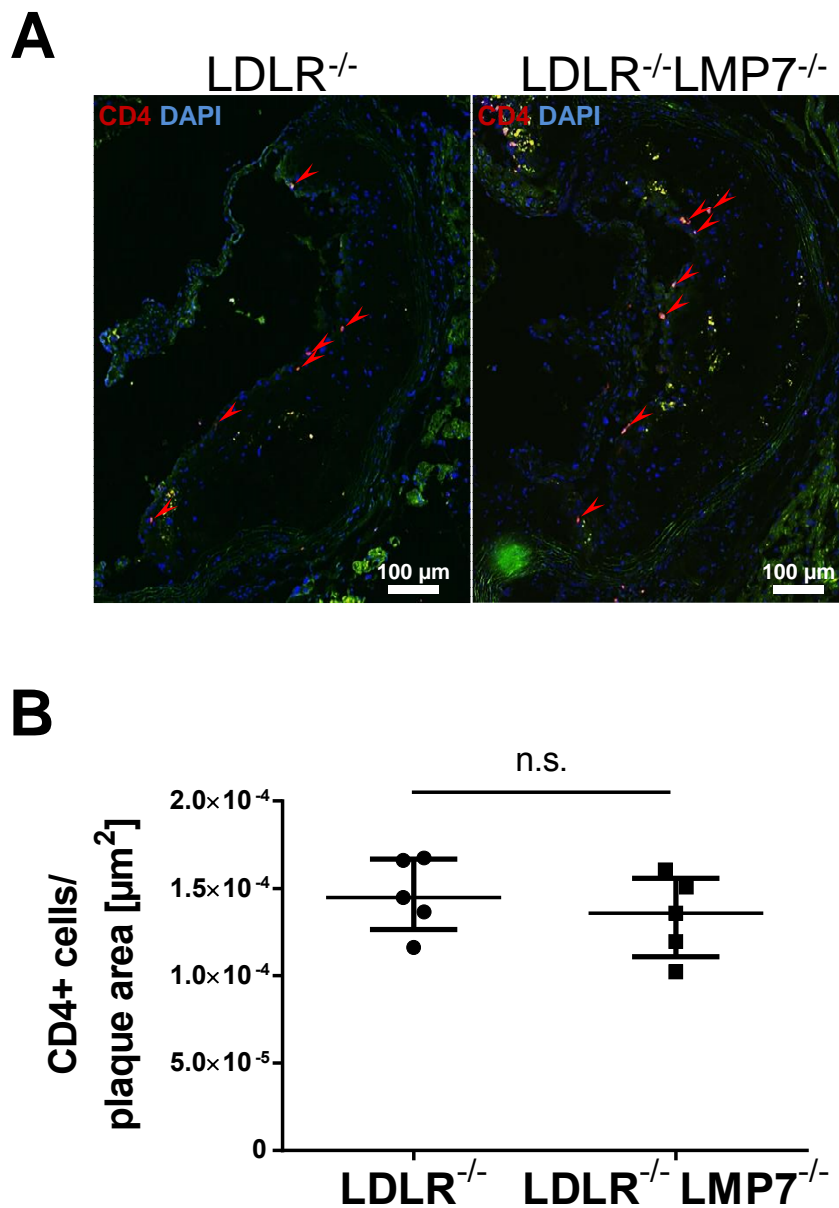

**Supplement Figure S4: T cells (CD4) in atherosclerotic plaques of the aortic root.** Aortic root cryosections from LDLR<sup>-/-</sup> and LDLR<sup>-/-</sup>LMP7<sup>-/-</sup> mice fed a Western-type diet for 24 weeks were analyzed for the number of CD4-positive cells per plaque area. **A** Representative merged images showing anti-CD4 immunofluorescence in red (red arrowheads). Nuclei were stained with DAPI (blue). Autofluorescence in green. **B** Quantification of CD4-positive cells per plaque area. Data presented as individual values with median and interquartile ranges indicated. n=5 per group. n.s.= statistically non-significant using unpaired *t*-test.

## Supplement Figure S5

**A**

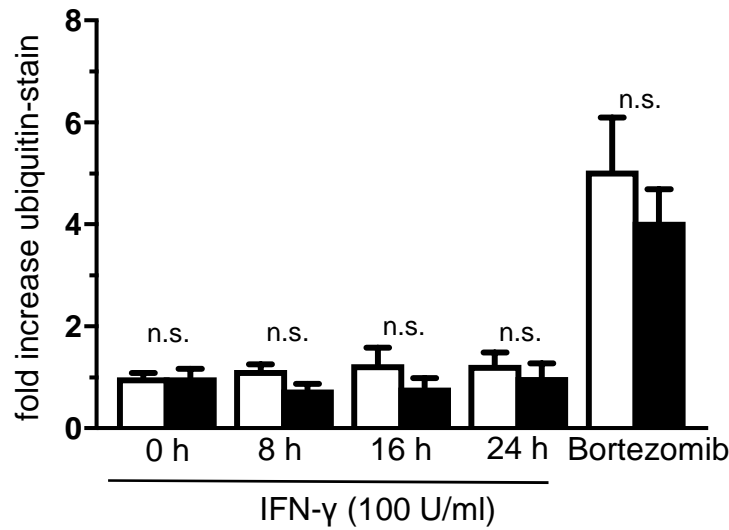

**B**

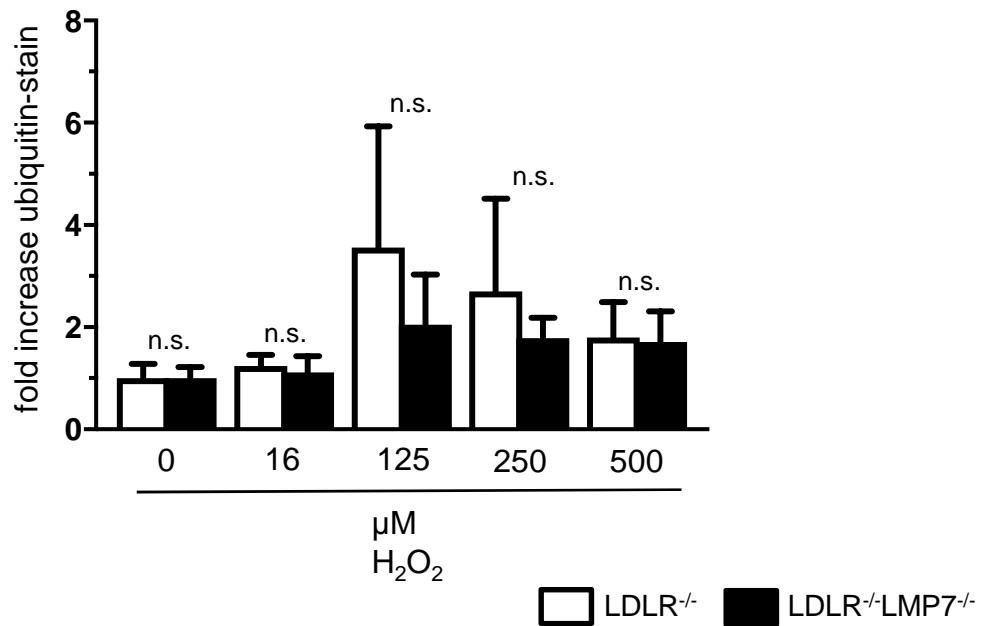

**Supplement Figure S5. Densitometric analyses of anti-ubiquitin Western blots (Figure 2C and 2D).** Bone marrow derived macrophages (BMDM) of LDLR<sup>-/-</sup>LMP7<sup>-/-</sup> and LDLR<sup>-/-</sup> mice: **(A)** lysates of IFN-γ (100 U/ml) treated BMDM; Bortezomib (5 ng/ml) treated BMDM served as positive controls, n = 4 experiments; **(B)** lysates of BMDM after treatment with hydrogen peroxide (H<sub>2</sub>O<sub>2</sub>) over 1 hour; n = 3 experiments. Data are presented as mean ± SEM; n.s. = statistically non-significant using two-way ANOVA followed by Sidak's multiple comparisons test.

## Supplement Figure S6

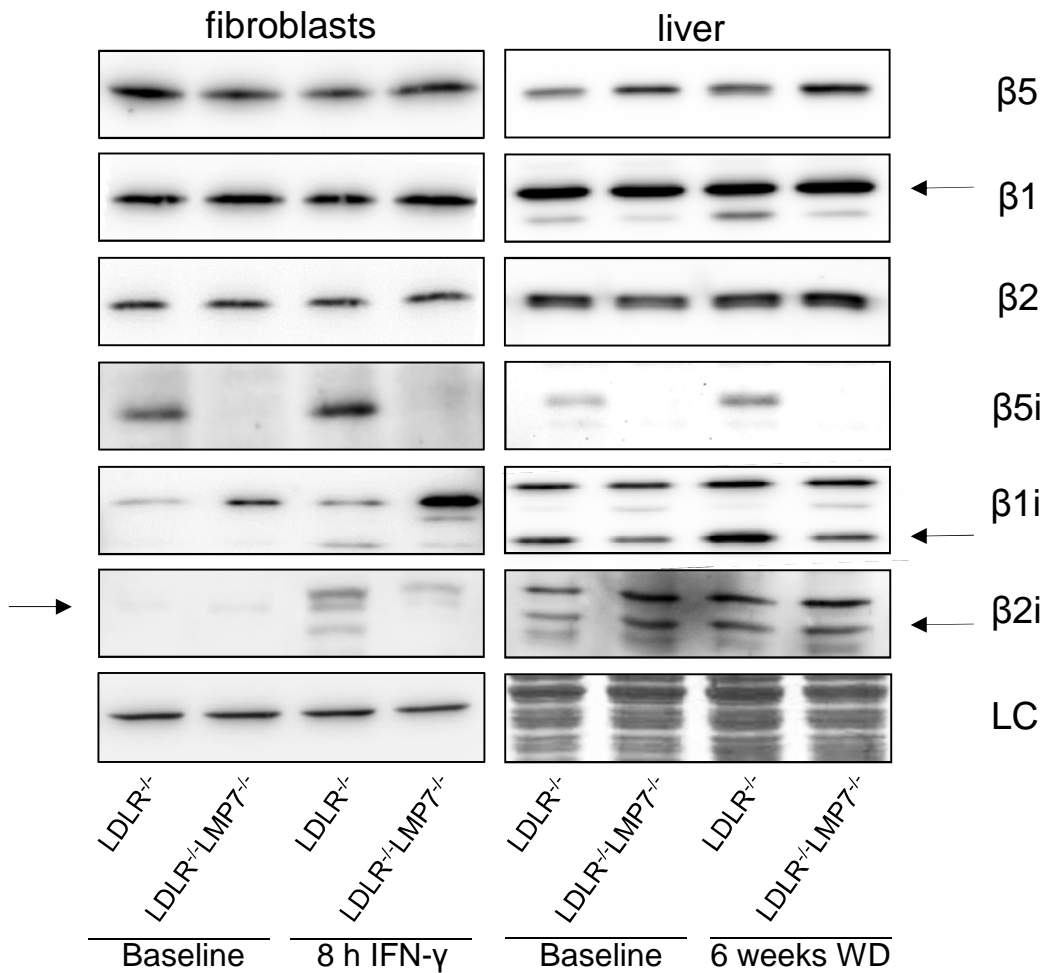

**Supplement Figure S6. Impact of  $\beta 5i/LMP7$ -deficiency on proteasome composition.** Western blot analysis of standard proteasome ( $\beta 1$ ,  $\beta 2$ , and  $\beta 5$ ) and immunoproteasome ( $\beta 1i$ ,  $\beta 2i$ , and  $\beta 5i$ ) subunits expression in whole lysates of murine  $LDLR^{-/-}LMP7^{-/-}$  and  $LDLR^{-/-}$  fibroblasts before (baseline) and after treatment with IFN- $\gamma$  (100 U/ml) for 8 hours (left panel) and of liver lysates of  $LDLR^{-/-}LMP7^{-/-}$  and  $LDLR^{-/-}$  mice. LC indicates loading controls, actin (for fibroblasts) and amidoblack (for liver).



## Supplement Figure S7

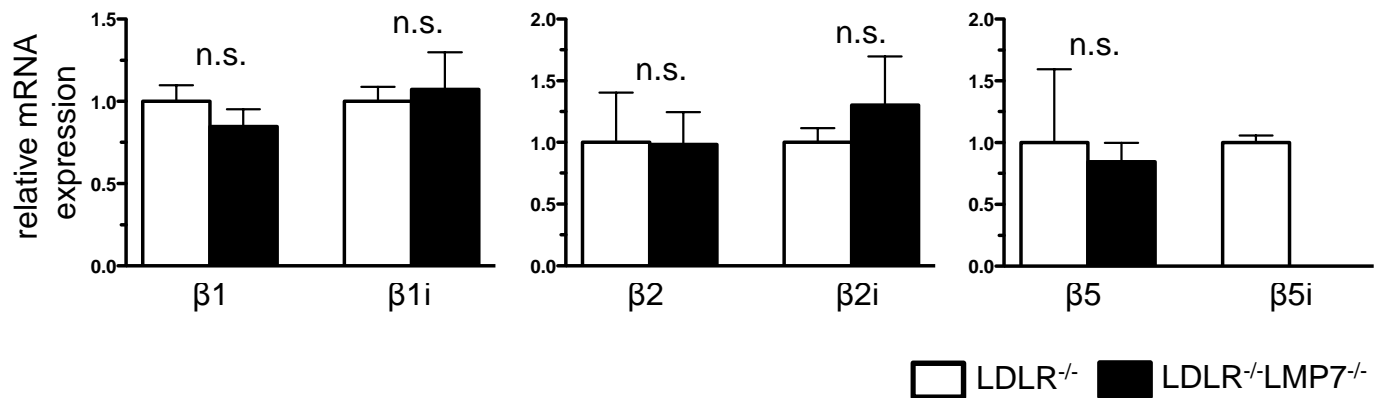

**Supplement Figure S7. Impact of  $\beta 5i/LMP7$ -deficiency on proteasome composition.** mRNA expression determined by quantitative real-time RT-PCR of standard proteasome ( $\beta 1$ ,  $\beta 2$ , and  $\beta 5$ ) and immunoproteasome ( $\beta 1i$ ,  $\beta 2i$ , and  $\beta 5i$ ) subunits of murine  $LDLR^{-/-}LMP7^{-/-}$  and  $LDLR^{-/-}$  bone marrow derived macrophages (BMDM);  $LDLR^{-/-}LMP7^{-/-}$  columns show fold-change in mRNA expression levels relative to expression levels of BMDM of  $LDLR^{-/-}$  mice;  $n = 3$  experiments. Data are presented as mean  $\pm$  SEM; n.s. = statistically non-significant using Mann-Whitney  $U$  test.
