# Supplementary material for: Immunoproteasome subunit ß5i/LMP7-deficiency in atherosclerosis
Source: PubMed Central journal article supplement (PMC5645401; doi:10.1038/s41598-017-13592-w), 2017-10-17
Supplement: 41598_2017_13592_MOESM2_ESM.pdf [file 41598_2017_13592_MOESM2_ESM.pdf]

## Supplementary Information: Full Western Blots

### Immunoproteasome subunit $\beta 5i$ /LMP7-deficiency in atherosclerosis

Bernd Hewing<sup>1,2,7</sup>, Antje Ludwig<sup>1,2</sup>, Cristian Dan<sup>1,2</sup>, Max Pötzsch<sup>1,2</sup>, Carmen Hannemann<sup>1,2</sup>, Andreas Petry<sup>3,4</sup>, Dilyara Lauer<sup>5</sup>, Agnes Görlach<sup>3,4</sup>, Elena Kaschina<sup>5</sup>, Dominik N. Müller<sup>2,6,7,8</sup>, Gert Baumann<sup>1</sup>, Verena Stangl<sup>1,2</sup>, Karl Stangl<sup>1,2</sup>, Nicola Wilck<sup>1,2,6,8</sup>

<sup>1</sup>Medizinische Klinik m.S. Kardiologie und Angiologie, Charité-Universitätsmedizin Berlin, Campus Mitte, Berlin, Germany

<sup>2</sup>DZHK (German Center for Cardiovascular Research), partner site Berlin, Germany

<sup>3</sup>Experimental and Molecular Pediatric Cardiology, German Heart Center Munich, Technical University Munich, Munich, Germany

<sup>4</sup>DZHK (German Center for Cardiovascular Research), partner site Munich, Germany

<sup>5</sup>Institute of Pharmacology, Center for Cardiovascular Research, Charité-Universitätsmedizin Berlin, Berlin, Germany

<sup>6</sup>Experimental and Clinical Research Center, a joint cooperation of Max Delbrück Center for Molecular Medicine and Charité Medical Faculty, Berlin, Germany

<sup>7</sup>Berlin Institute of Health (BIH), Berlin, Germany

<sup>8</sup>Max Delbrück Center for Molecular Medicine in the Helmholtz Association, Berlin, Germany

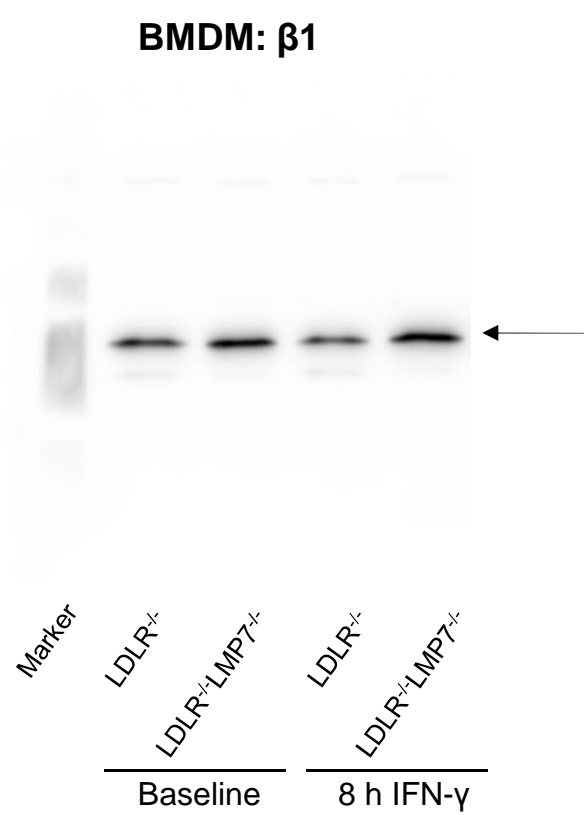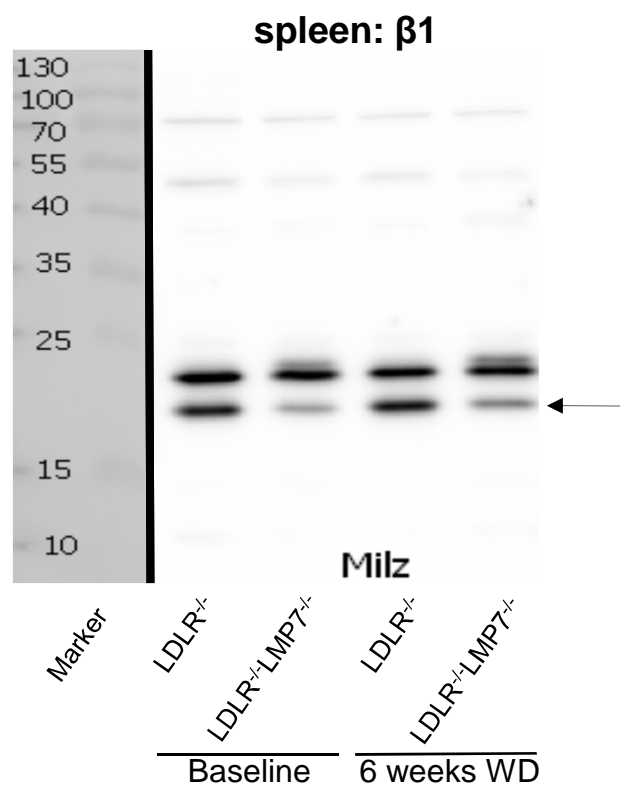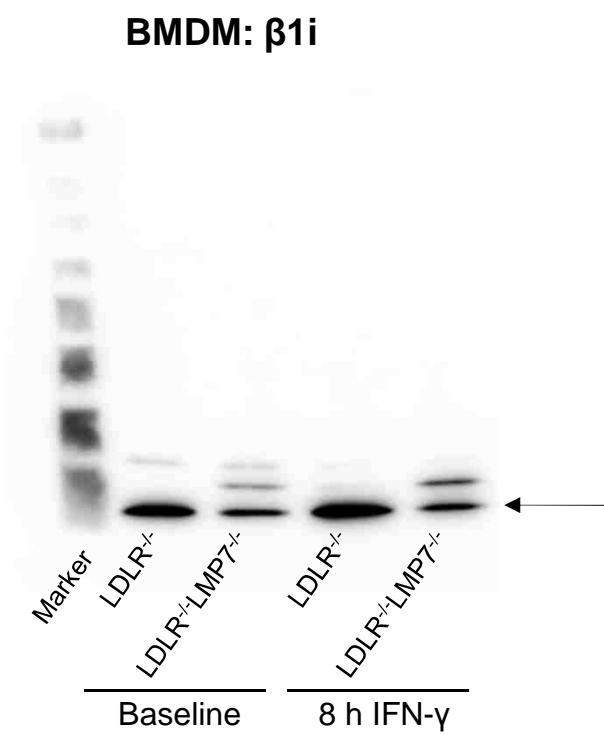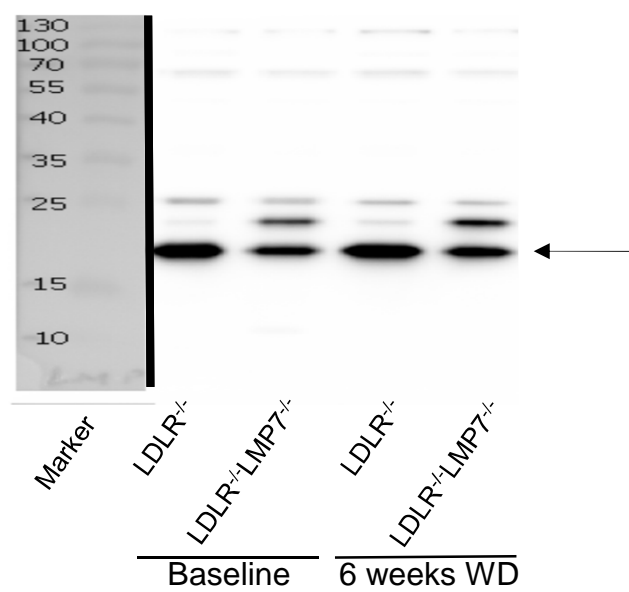

**BMDM:  $\beta 2$**

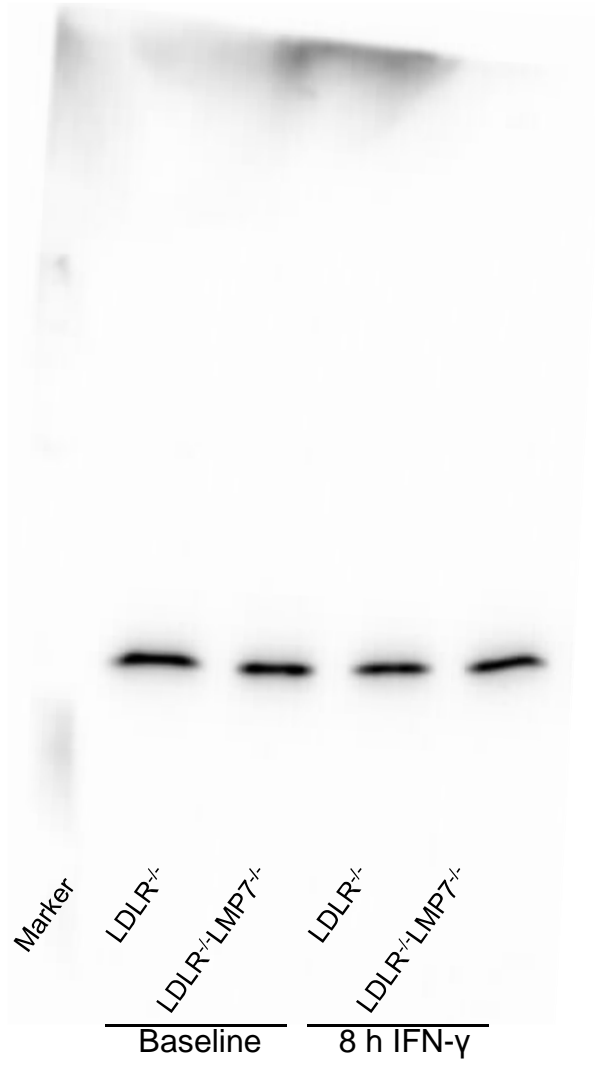

**spleen:  $\beta 2$**

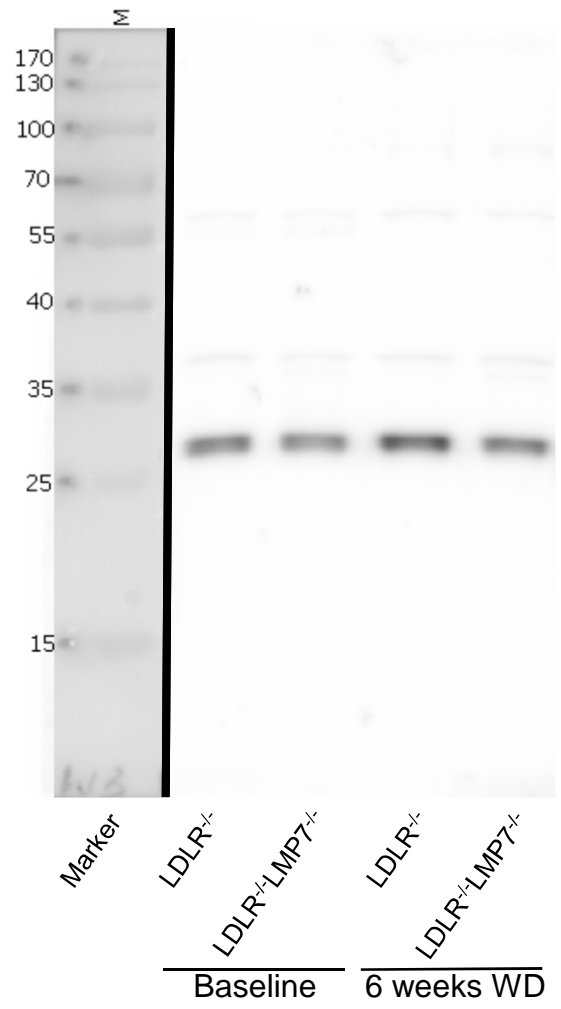

**BMDM:  $\beta$ 2i**

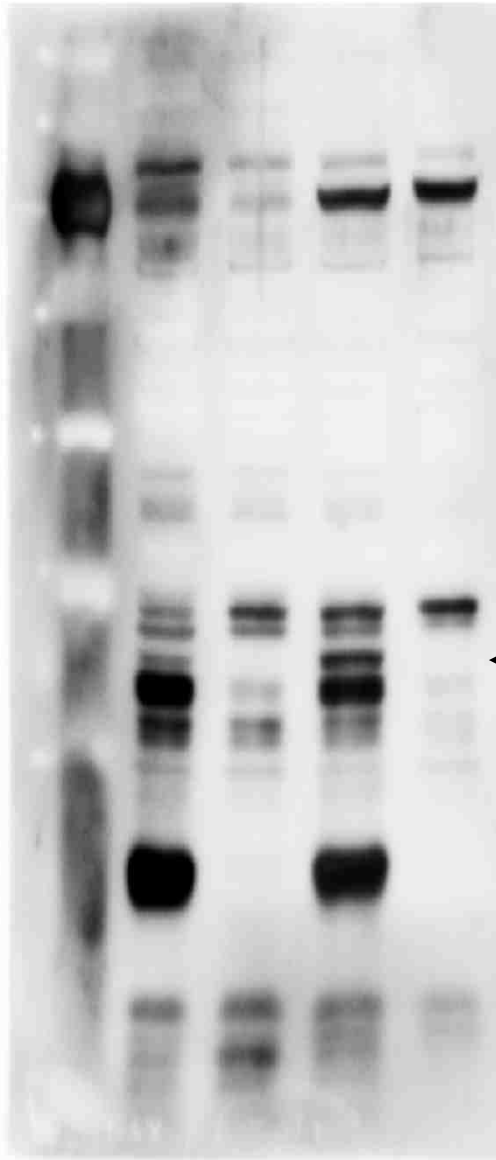

Marker  
LDLR<sup>-/-</sup>  
LDLR<sup>-/-</sup>LMP7<sup>+/-</sup>  
LDLR<sup>-/-</sup>  
LDLR<sup>-/-</sup>LMP7<sup>+/-</sup>  
Baseline 8 h IFN- $\gamma$

**spleen:  $\beta$ 2i**

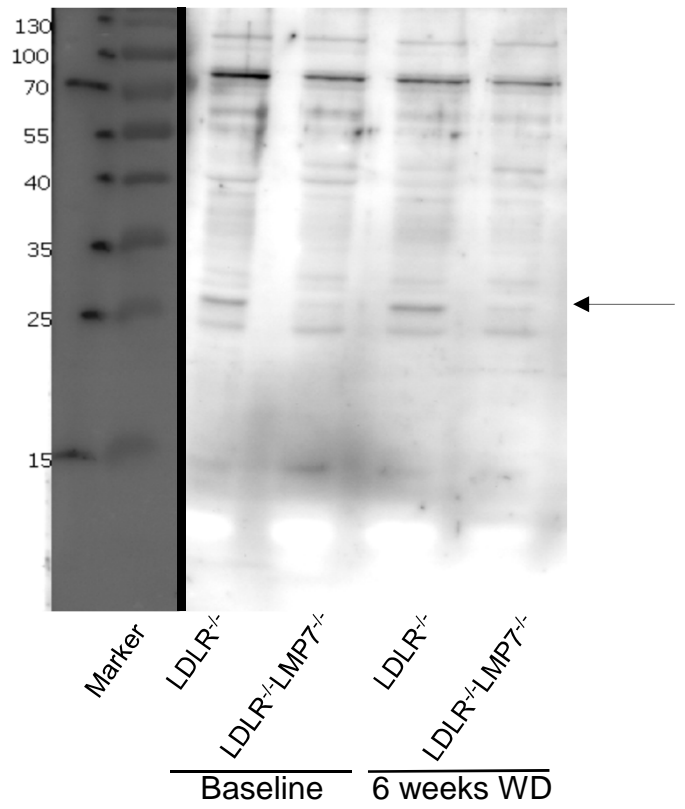

Marker  
LDLR<sup>-/-</sup>  
LDLR<sup>-/-</sup>LMP7<sup>+/-</sup>  
LDLR<sup>-/-</sup>  
LDLR<sup>-/-</sup>LMP7<sup>+/-</sup>  
Baseline 6 weeks WD

**BMDM:  $\beta 5$**

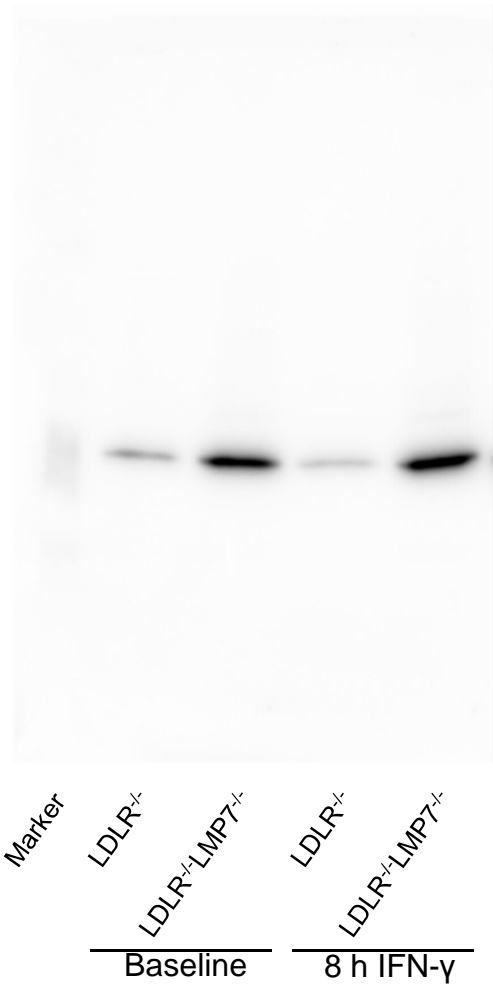

**spleen:  $\beta 5$**

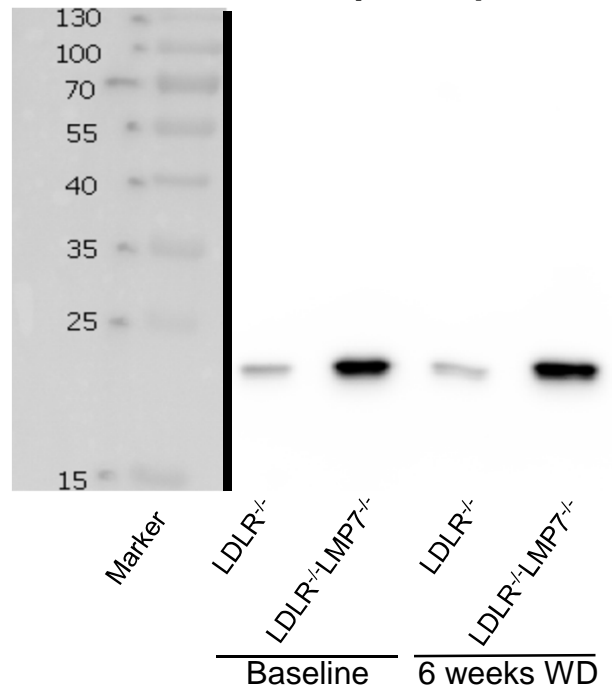

**BMDM:  $\beta 5i$**

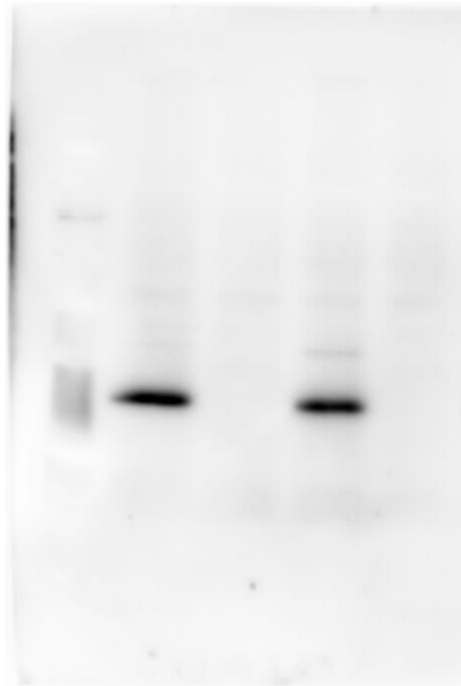

Marker  
LDLR<sup>-/-</sup>  
LDLR<sup>-/-</sup>LMP7<sup>+/-</sup>  
LDLR<sup>-/-</sup>  
LDLR<sup>-/-</sup>LMP7<sup>+/-</sup>  
Baseline 8 h IFN- $\gamma$

**spleen:  $\beta 5i$**

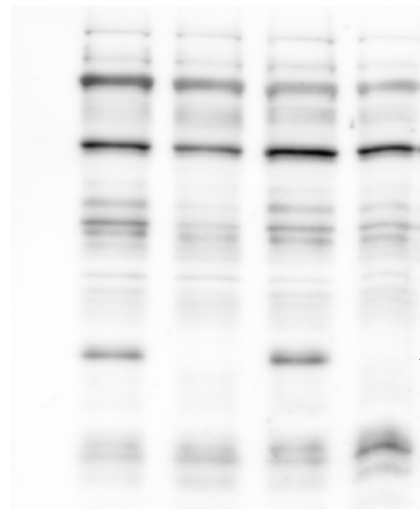

LDLR<sup>-/-</sup>  
LDLR<sup>-/-</sup>LMP7<sup>+/-</sup>  
LDLR<sup>-/-</sup>  
LDLR<sup>-/-</sup>LMP7<sup>+/-</sup>  
Baseline 6 weeks WD

**26S BMDM:  $\alpha 4$**

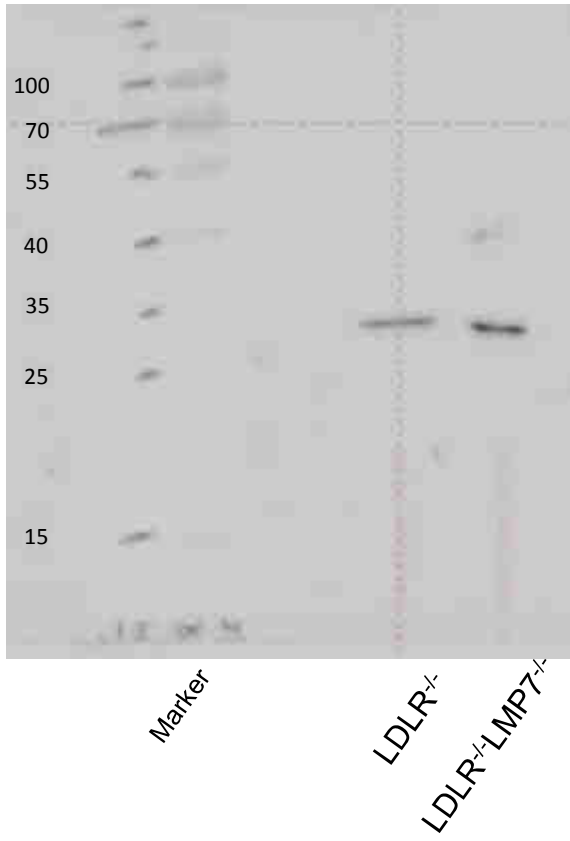

**26S spleen:  $\alpha 4$**

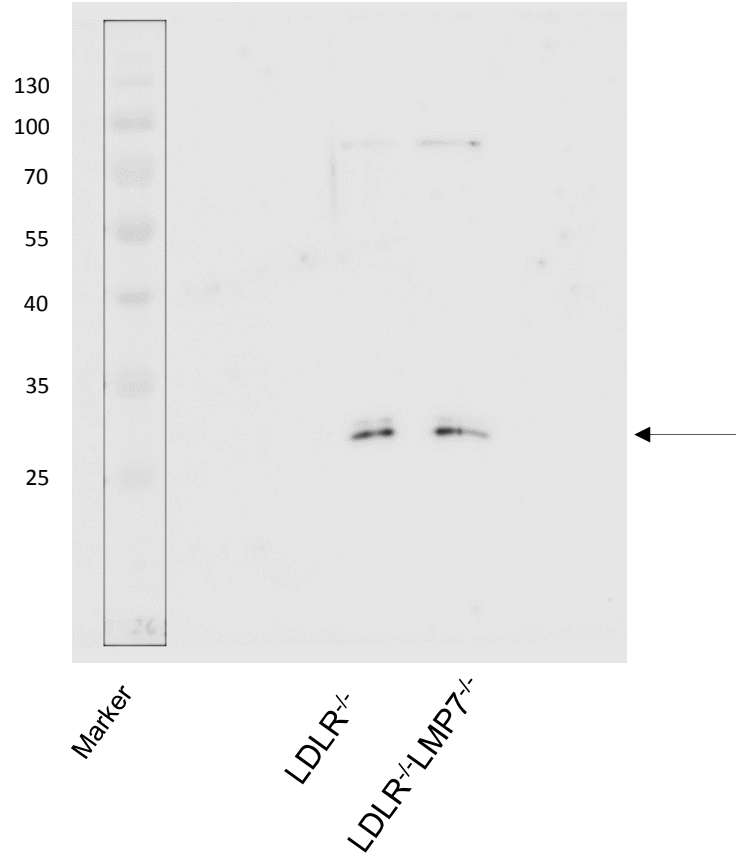

26S BMDM:  $\beta 5$

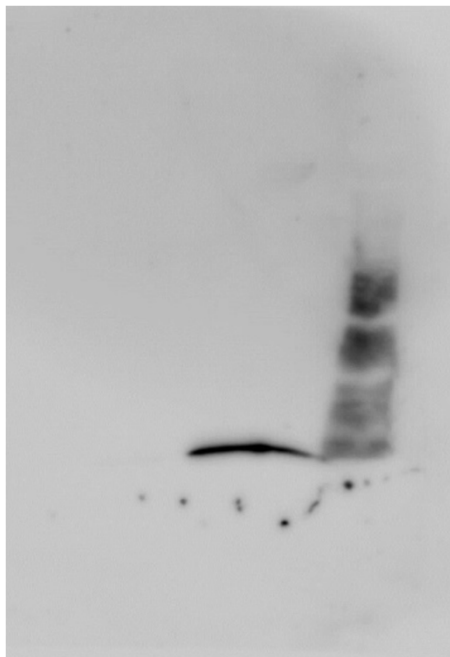

LDLR<sup>-/-</sup>  
LDLR<sup>-/-</sup>LMP7<sup>-/-</sup>  
Marker

26S spleen:  $\beta 5$

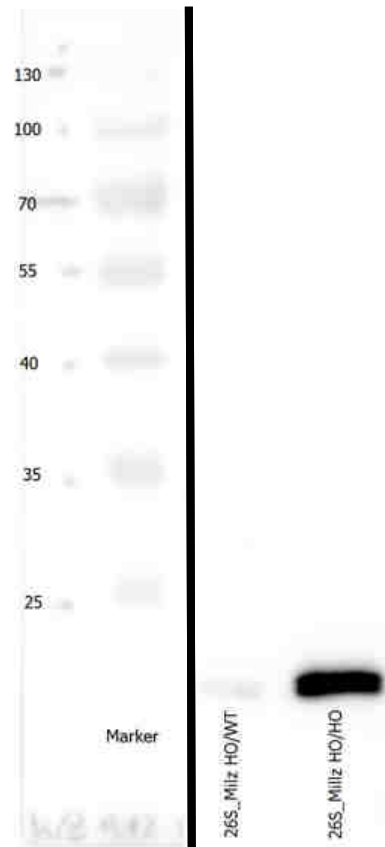

Marker  
LDLR<sup>-/-</sup>  
LDLR<sup>-/-</sup>LMP7<sup>-/-</sup>  
26S\_Milz HO/WT  
26S\_Milz HO/HO



26S BMDM:  $\beta 1$

26S spleen:  $\beta 1$

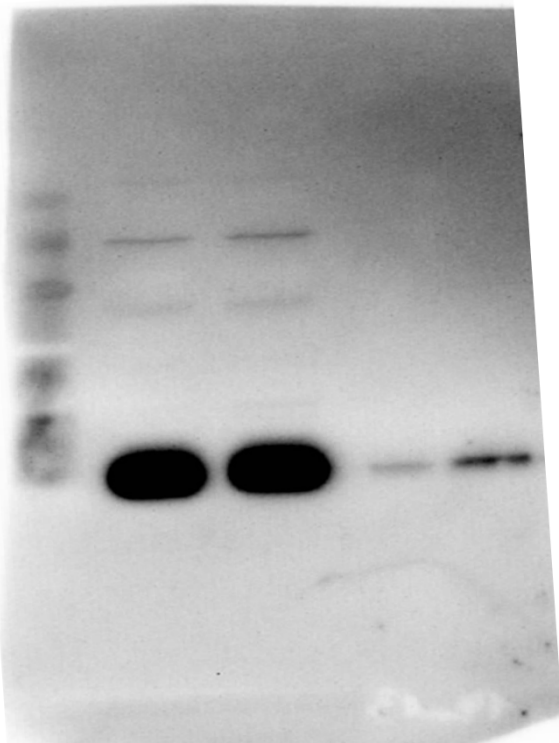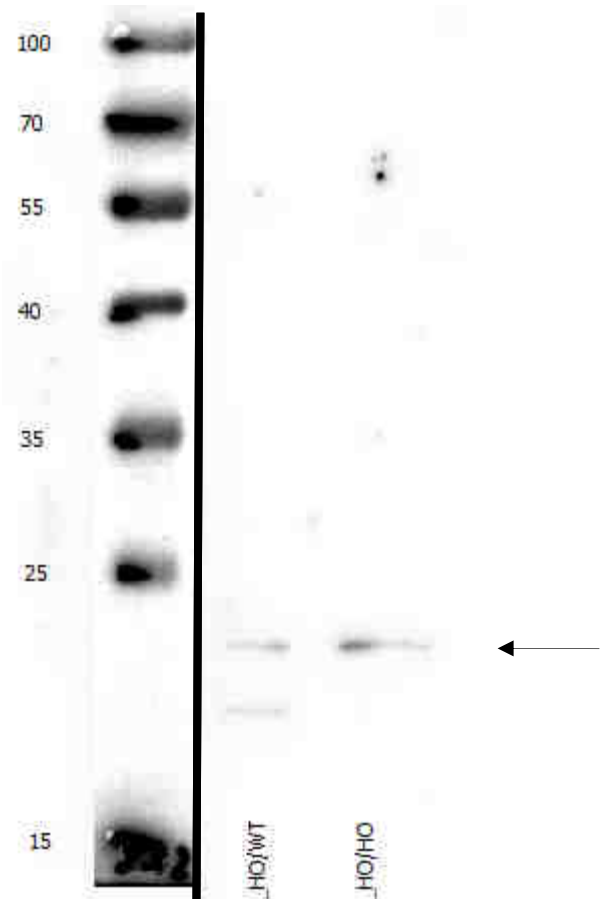

Marker  
positive controls  
LDLR<sup>-/-</sup>  
LDLR<sup>-/-</sup>LMP7<sup>-/-</sup>

Marker KDa  
26S\_Milz\_HO/WT  
26S\_Milz\_HO/HO  
LDLR<sup>-/-</sup>  
LDLR<sup>-/-</sup>LMP7<sup>-/-</sup>

26S BMDM:  $\beta 2$

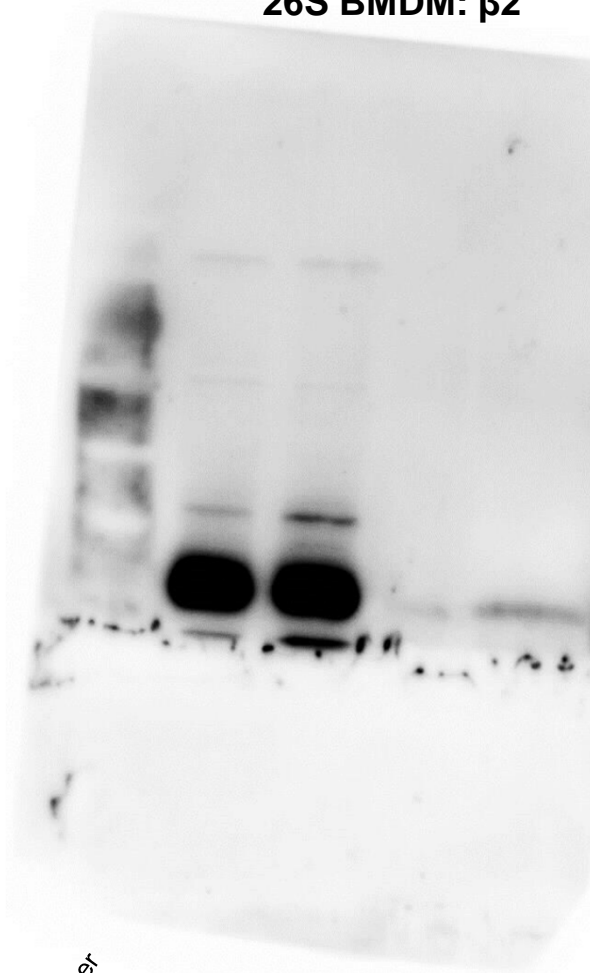

Marker

positive controls

$LDLR^{-/-}$

$LDLR^{-/-}LMP7^{-/-}$

26S spleen:  $\beta 2$

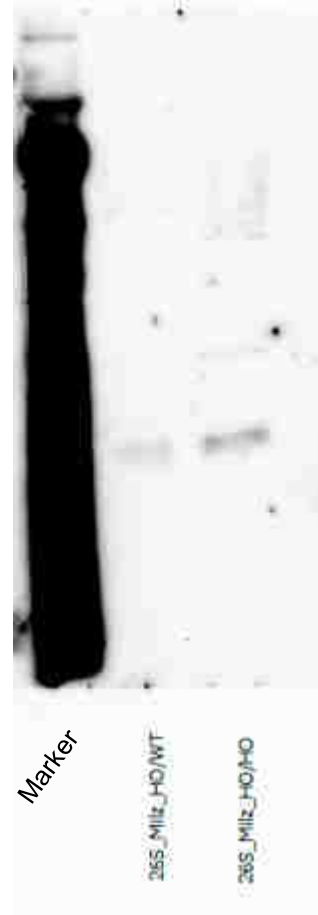

Marker

$26S\_Milz\_HO/WT$

$26S\_Milz\_HO/HO$

26S BMDM:  $\beta 5i$

26S spleen:  $\beta 5i$

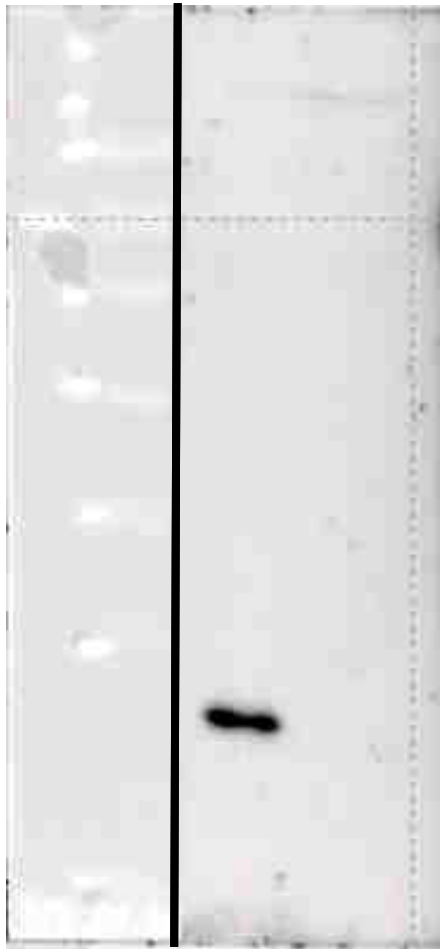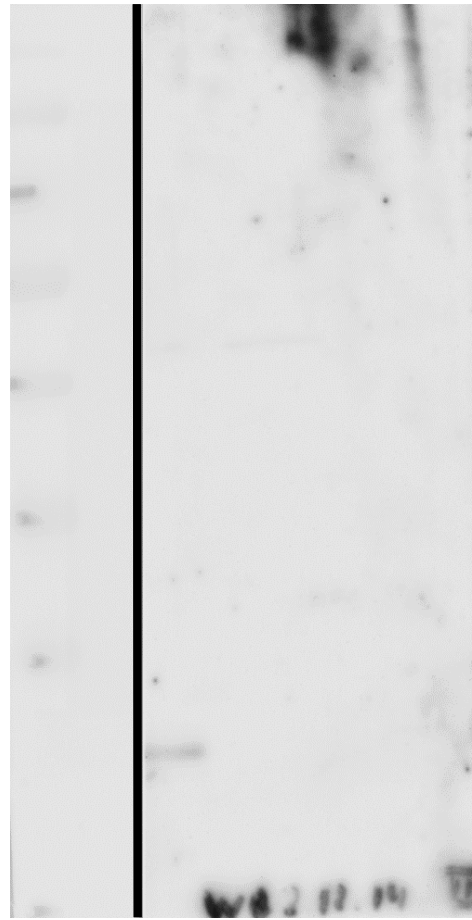

Marker

LDLR<sup>-/-</sup>

LDLR<sup>-/-</sup>LMP7<sup>-/-</sup>

Marker

LDLR<sup>-/-</sup>

LDLR<sup>-/-</sup>LMP7<sup>-/-</sup>

26S BMDM:  $\beta 1i$

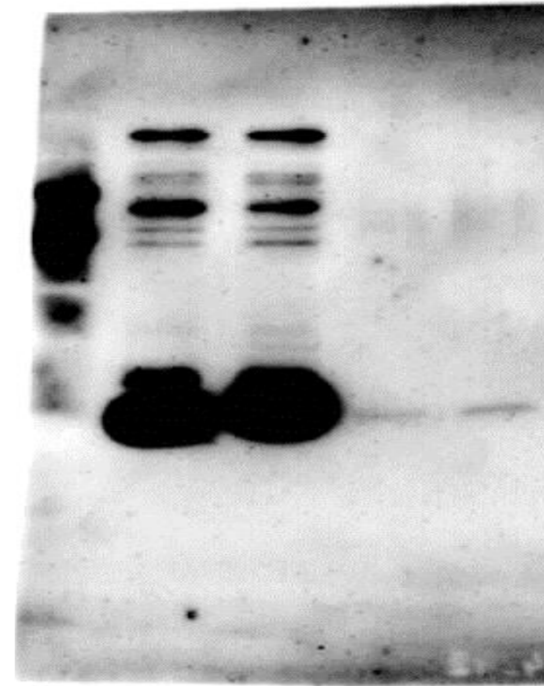

Marker  
positive controls  
LDLR<sup>-/-</sup>  
LDLR<sup>-/-</sup>LMP7<sup>-/-</sup>

26S spleen:  $\beta 1i$

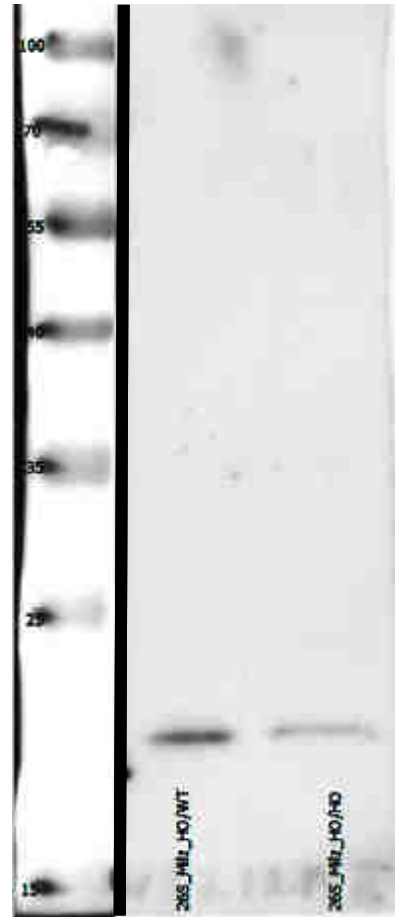

Marker  
LDLR<sup>-/-</sup>  
LDLR<sup>-/-</sup>LMP7<sup>-/-</sup>

**26S BMDM:  $\beta$ 2i**  
(~26 kDa)

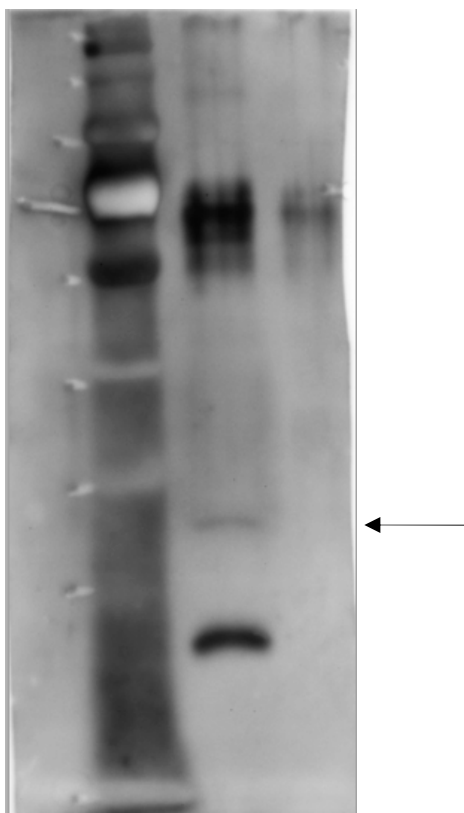

Marker

LDLR<sup>-/-</sup>

LDLR<sup>-/-</sup>LMP7<sup>-/-</sup>

**26S spleen:  $\beta$ 2i**  
(~26 kDa)

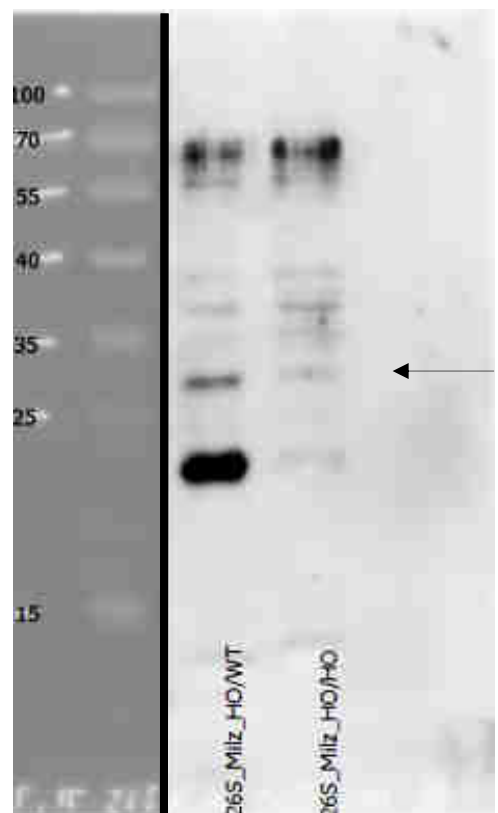

Marker

LDLR<sup>-/-</sup>

LDLR<sup>-/-</sup>LMP7<sup>-/-</sup>
